# Supplementary material
Source: MDPI journal article supplement (https://www.mdpi.com/2077-0472/11/7/608)
Supplement: s1 [file s1]

## Supplementary materials

**Table S1.** Primer pairs for stress-responsive genes used in reverse-transcription qPCR

| Gene ID      | Primers          | Primer sequences (5'-3') | Reference |
|--------------|------------------|--------------------------|-----------|
| Contig_970   | <i>AVP-F</i>     | AGAAGTACATTGAGGCTGGTG    | [15]      |
|              | <i>AVP-R</i>     | GTCCAGAGGTGTCCTTCAATG    |           |
| Contig_13195 | <i>NHX1-F</i>    | CAATGCCGGGTTTCAAGTAAAG   | [15]      |
|              | <i>NHX1-R</i>    | AGTAGCACCCGTGGTTATAATG   |           |
| Contig_34725 | <i>P5CS-F</i>    | GGCTGCAGGATAATCAGTCTTT   | [15]      |
|              | <i>P5CS-R</i>    | GTTCTTGGTCATGCTGATGGA    |           |
| AF056621.1   | <i>CuZnSOD-F</i> | TAATTGCTGATGCCAACG       | [36]      |
|              | <i>CuZnSOD-R</i> | ACCACAGGCTAATCTTCCAC     |           |
| BE205441.1   | <i>POD-F</i>     | CTACCTGGCCCTCATTTCAA     | [37]      |
|              | <i>POD-R</i>     | CTTCTTGGGCTGAATCCGTA     |           |
| JQ028730.1   | <i>Actin 2-F</i> | ATTCACGAGACCACCTAC       | [38]      |
|              | <i>Actin 2-R</i> | AACCACCACTAAGAACAATG     |           |

**Figure S1.**

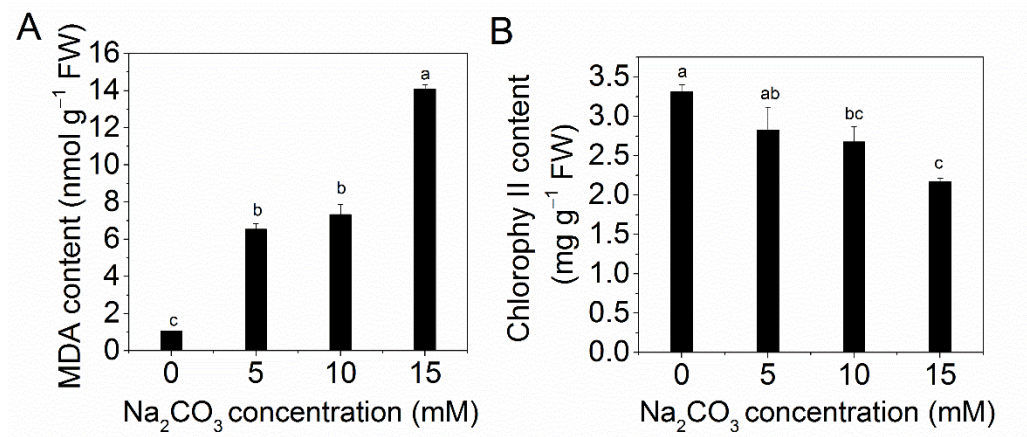

**Figure S1.** Effects of different concentrations of  $\text{Na}_2\text{CO}_3$  on the (A) MDA (malondialdehyde) and (B) chlorophyll contents in the leaves of alfalfa (*Medicago sativa* L.) seedlings. Different letters on the columns indicate significant differences ( $p < 0.05$ ) among concentrations based on Duncan's test.

**Figure S2.**

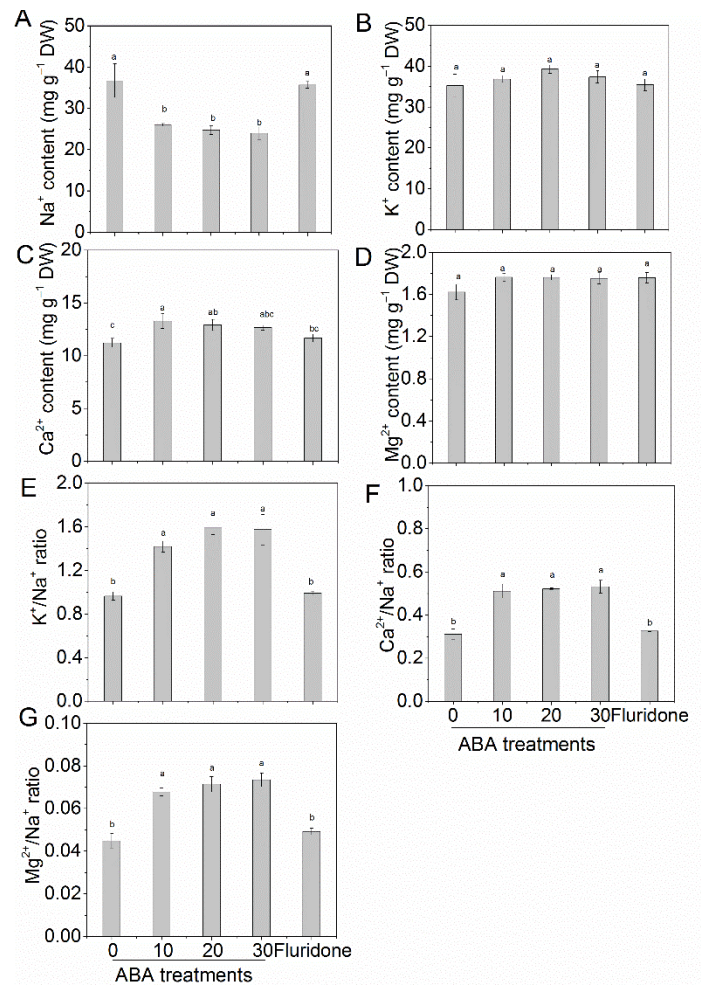

**Figure S2.** Abscissic acid (ABA) priming alleviated damage to alfalfa (*Medicago sativa* L.) seedlings under alkaline conditions. Eighteen-day-old alfalfa seedlings were also root-drenched with an ABA concentration of 0, 10, 20, or 30  $\mu\text{M}$  or with fluridone (an ABA biosynthesis inhibitor, 10  $\mu\text{M}$ ) for 16 h and then exposed to alkaline stress (15 mM  $\text{Na}_2\text{CO}_3$ ). (A)  $\text{Na}^+$  content; (B)  $\text{K}^+$  content; (C)  $\text{Ca}^{2+}$  content; (D)  $\text{Mg}^{2+}$  content; (E)  $\text{K}^+/\text{Na}^+$  ratio; (F)  $\text{Ca}^{2+}/\text{Na}^+$  ratio; (G)  $\text{Mg}^{2+}/\text{Na}^+$  ratio. Values are the mean  $\pm$  standard error,  $n = 3$ . Different letters on the columns indicate significant differences ( $p < 0.05$ ) at (A to G) between ABA treatments and fluridone treatment based on Duncan's test.
